# Supplementary material for: A novel turn-off green carbon dot-based fluorescent probe for selective determination of nitrazepam in its pharmaceutical dosage form and milk samples
Source: Royal Society of Chemistry journal article supplement (doi:10.1039/d4ay01216j), 2024-01-01
Supplement: d4ay01216j1.pdf [file d4ay01216j1.pdf]

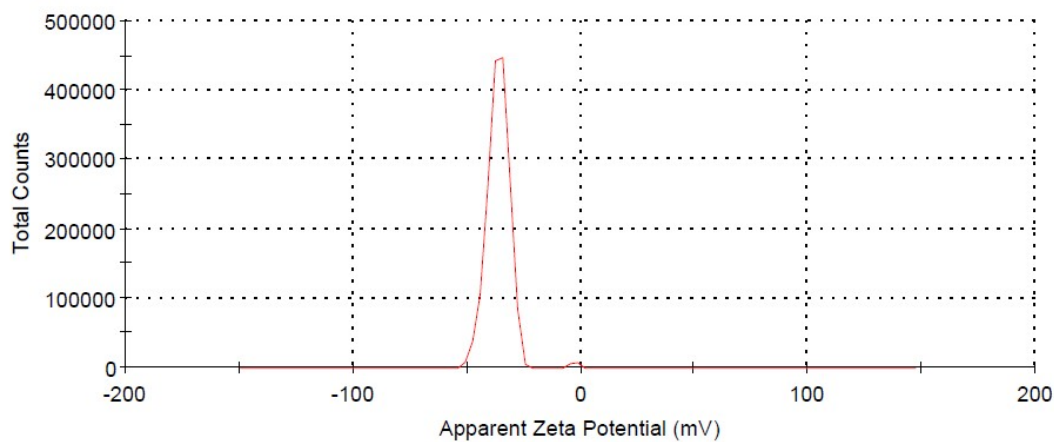

**Fig 1S.** Zeta potential value of CDs.

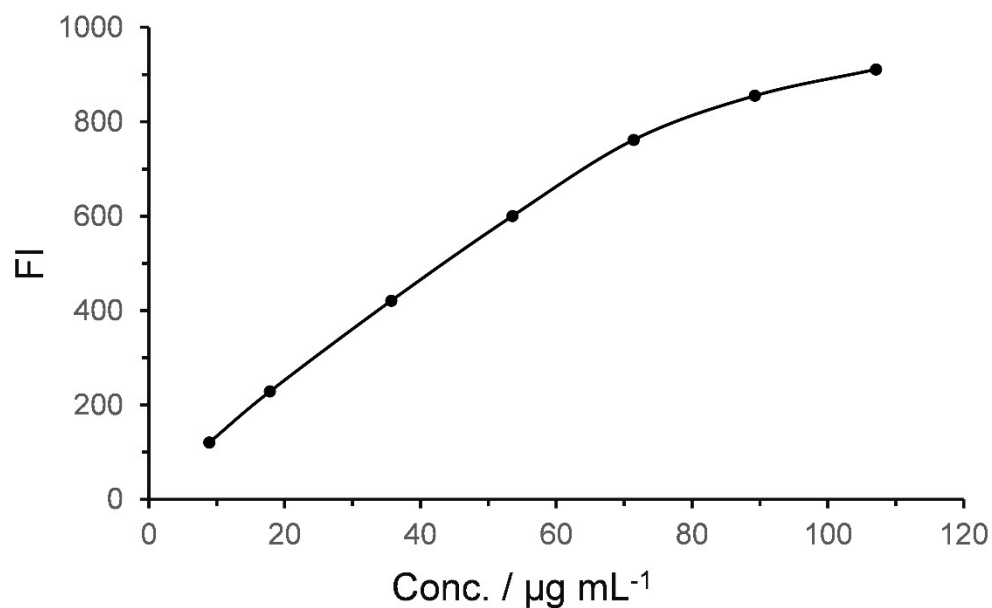

**Fig 2S.** Fluorescence emission at different concentrations of the prepared CDs (10-100  $\mu\text{g mL}^{-1}$ ).

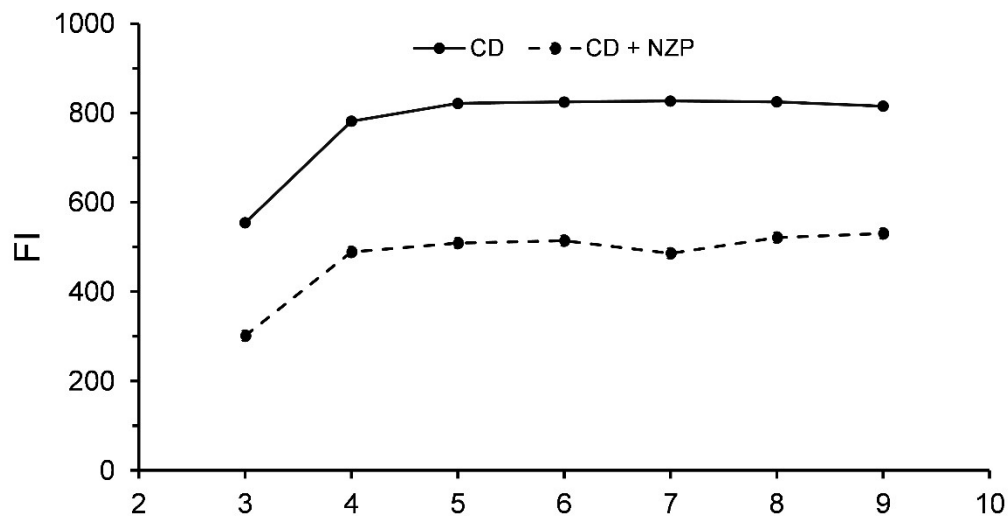

**Fig 3S.** Fluorescence intensity of the prepared CDs in the absence and presence of NZP ( $10 \mu\text{g mL}^{-1}$ ) at different pH levels.

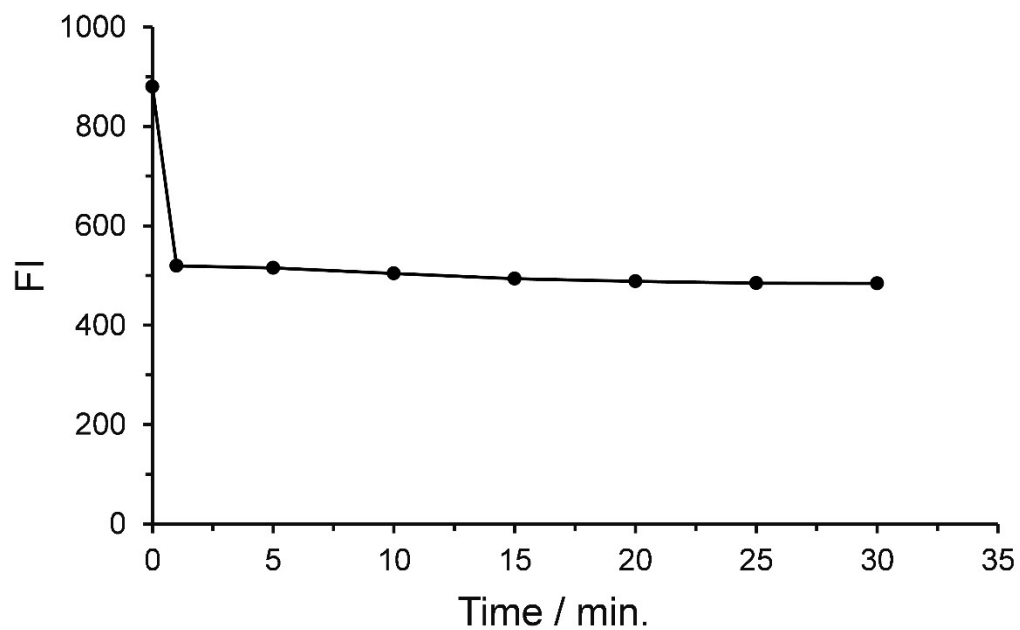

**Fig 4S.** Sensor response time after adding ( $10 \mu\text{g mL}^{-1}$ ) NZP to fluorescence cell containing CDs.

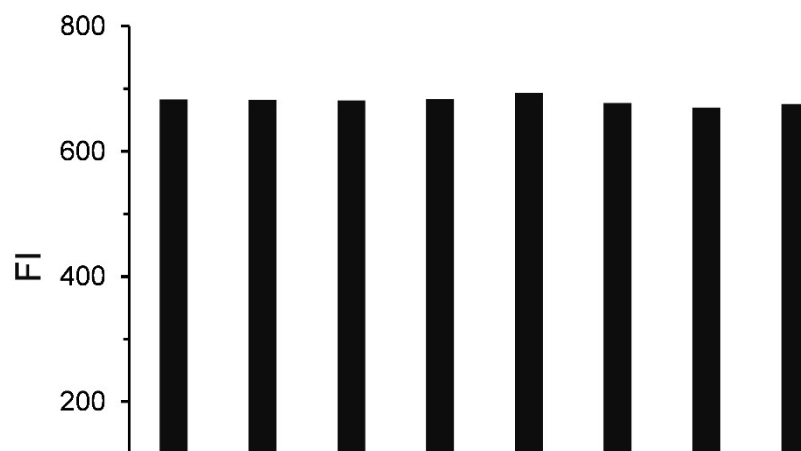

**Fig 5S.** Effect of different NaCl concentrations (0-0.8 M) on fluorescence intensity of the prepared CDs

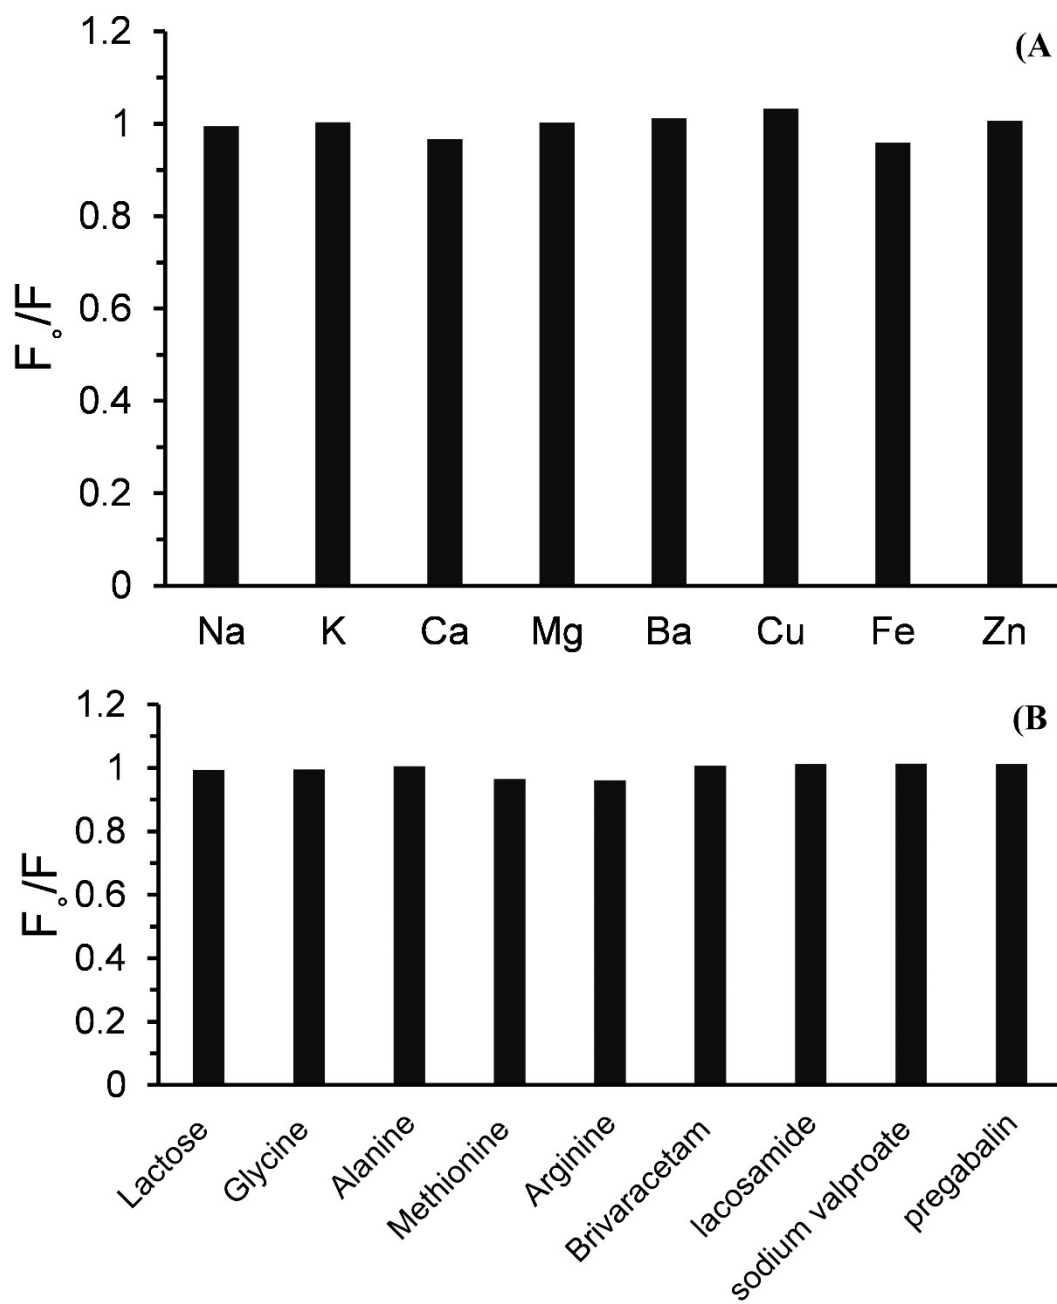

**Fig 6S.** Selectivity of the proposed method toward some metals (A), organic compounds, and other anticonvulsant drugs (B).
